# Supplementary material for: Synthetic 18F-FDG PET Image Generation Using a Combination of Biomathematical Modeling and Machine Learning
Source: MDPI journal article supplement (doi:10.3390/cancers14112786), 2022-06-03
Supplement: s1 [file s1]

# Synthetic 18F-FDG PET Image Generation using a Combination of Biomathematical Modeling and Machine Learning

Mohammad Amin Abazari , Madjid Soltani , Farshad Moradi Kashkooli and Kaamran Raahemifar

**Table S1.** Parameters used for interstitial transport modeling.

| Parameter               | Unit                                             | Definition                                     | Tissue type/Value |                        | Reference |
|-------------------------|--------------------------------------------------|------------------------------------------------|-------------------|------------------------|-----------|
| $\pi_i$                 | mmHg                                             | Oncotic pressure of interstitial fluid         | Tumor             | 10                     | [26]      |
|                         |                                                  |                                                | Healthy           | 15                     |           |
| $\pi_B$                 | mmHg                                             | Oncotic pressure of microvessels               | Tumor             | 20                     | [26, 31]  |
|                         |                                                  |                                                | Healthy           | 20                     |           |
| $\sigma_s$              | -                                                | Coefficient of average osmotic reflection      | Tumor             | 0.91                   | [26, 31]  |
|                         |                                                  |                                                | Healthy           | 0.82                   |           |
| $L_p$                   | $\frac{\text{m}}{\text{Pa} \cdot \text{s}}$      | Hydraulic conductivity of the microvessel wall | Tumor             | $2.1 \times 10^{-11}$  | [26, 31]  |
|                         |                                                  |                                                | Healthy           | $0.27 \times 10^{-11}$ |           |
| $L_{PL}(\frac{S}{V})_L$ | $\frac{1}{\text{Pa} \cdot \text{s}}$             | Coefficient of lymph filtration                | Healthy           | $1 \times 10^{-7}$     | [26]      |
| $\kappa$                | $\frac{\text{cm}^2}{\text{mmHg} \cdot \text{s}}$ | Hydraulic conductivity of interstitium         | Tumor             | $4.13 \times 10^{-8}$  | [26, 31]  |
|                         |                                                  |                                                | Healthy           | $8.53 \times 10^{-9}$  |           |
| $P_L$                   | Pa                                               | Hydrostatic pressure of lymphatic vessels      | Healthy           | 0                      | [26, 31]  |

**Table S2.** Parameters used for spatiotemporal distribution modeling of 18F-FDG transport.

| Parameter  | Unit                          | Definition                               | Tissue type/Value |                       | Reference |
|------------|-------------------------------|------------------------------------------|-------------------|-----------------------|-----------|
| $D_{eff}$  | $\frac{\text{m}^2}{\text{s}}$ | Effective diffusion coefficient          | Tumor             | $1.23 \times 10^{-9}$ | [26]      |
|            |                               |                                          | Healthy           | $0.37 \times 10^{-9}$ |           |
| $P_m$      | $\frac{\text{m}}{\text{s}}$   | Microvessel permeability coefficient     | Tumor             | $7.83 \times 10^{-6}$ | [26]      |
|            |                               |                                          | Healthy           | $2.26 \times 10^{-6}$ |           |
| $\sigma_f$ | -                             | Filtration reflection coefficient        |                   | 0.9                   | [26]      |
| $L_3$      | $\frac{1}{\text{s}}$          | Transport rate parameter into the cell   |                   | $8.2 \times 10^{-4}$  | [26]      |
| $L_4$      | $\frac{1}{\text{s}}$          | Transport rate parameter out of the cell |                   | $6.7 \times 10^{-4}$  | [26]      |
| $L_5$      | $\frac{1}{\text{s}}$          | Phosphorylation rate                     |                   | $5.3 \times 10^{-4}$  | [26]      |

Table S3. Boundary conditions of computational modelings.

| Regions        | Boundary conditions                                                                                    |                                                                                                                                  |
|----------------|--------------------------------------------------------------------------------------------------------|----------------------------------------------------------------------------------------------------------------------------------|
|                | Interstitial fluid flow                                                                                | 18F-FDG transport modeling                                                                                                       |
| Inner boundary | $(-\kappa_t P_i _{\Omega^t}) = (-\kappa_n P_i _{\Omega^n})$<br>$(P_i _{\Omega^t}) = (P_i _{\Omega^n})$ | $((D_{eff}^t \nabla C + V_i C) _{\Omega^t}) = ((D_{eff}^n \nabla C + V_i C) _{\Omega^n})$<br>$(C _{\Omega^t}) = (C _{\Omega^n})$ |
| Outer boundary | $P_i = \text{Constant}$                                                                                | $-n \cdot \nabla C = 0$                                                                                                          |

$\Omega^t$  and  $\Omega^n$  indicate the tumor and healthy tissues at their boundaries, respectively.  $P_i$  and  $C$  are interstitial fluid pressure and radiotracer concentration, respectively.

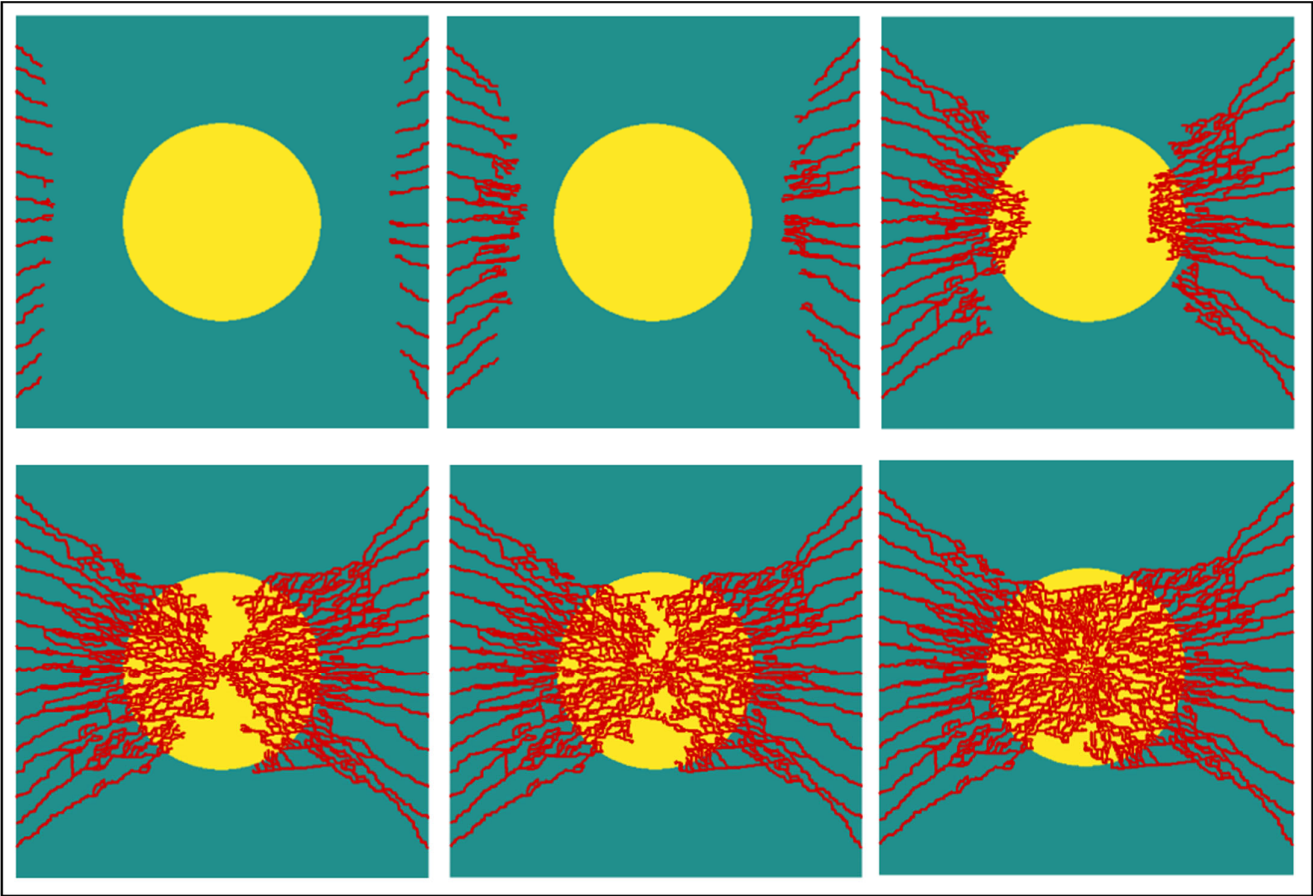

Figure S1. Results of discrete mathematical modeling of tumor-induced angiogenesis for six different stages of capillary networks. The initial sprouts on both vertical sides of the computational domain move toward the solid tumor with a 2.4 cm diameter.

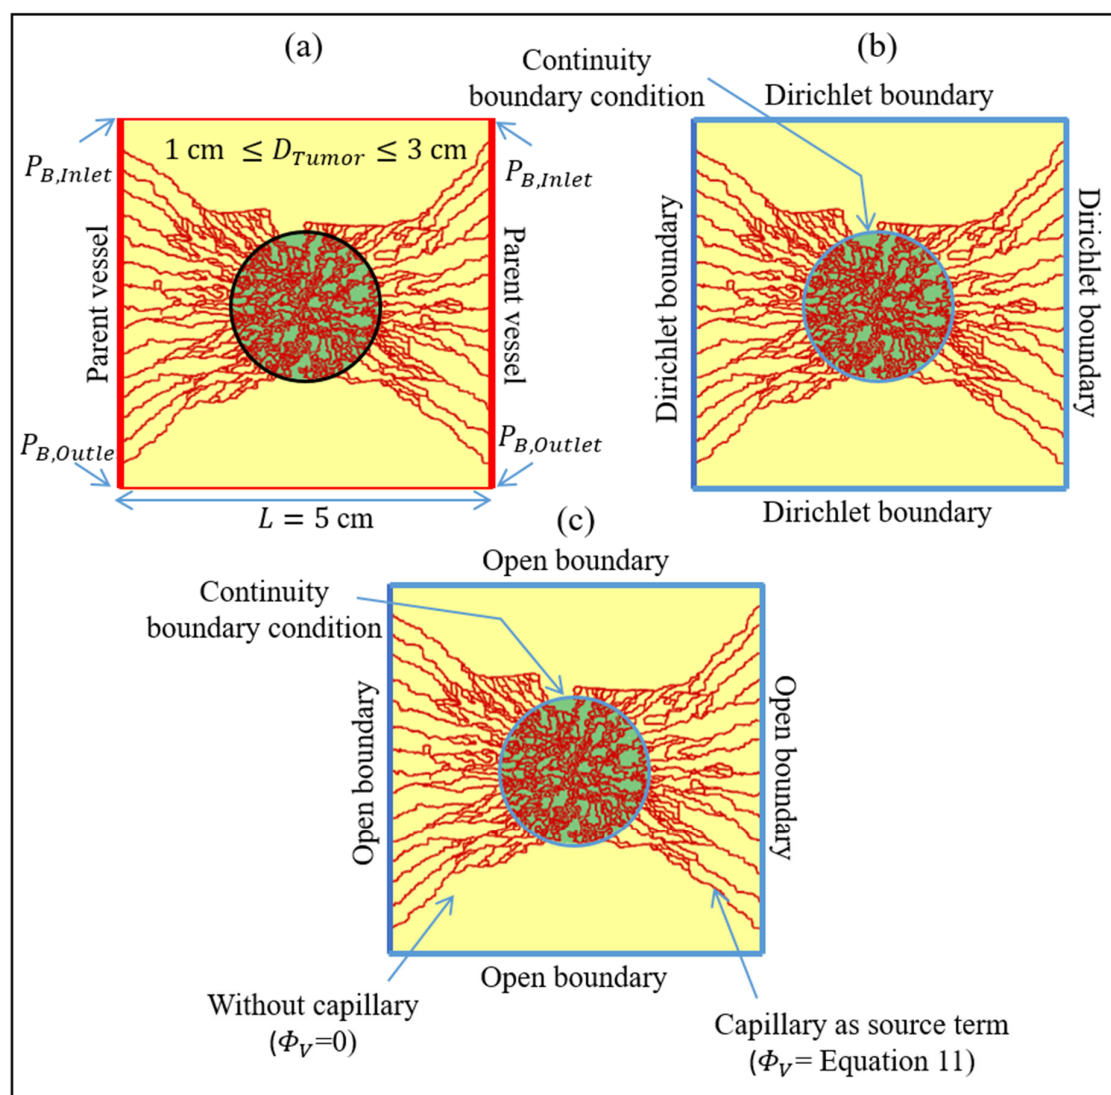

**Figure S2.** Schematic of the computational domain and implemented boundary conditions. **(a)** The domain consists of a solid tumor with a diameter of  $D_{\text{Tumor}}$ , surrounding healthy tissue, and tumor-associated vasculatures. Boundary conditions used in the intravascular blood flow simulation are also highlighted. **(b)** Boundary conditions that are used in interstitial fluid flow modeling. **(c)** Boundary conditions used in spatiotemporal modeling of 18F-FDG. The blue arrows indicate the position of different boundary conditions used in each stage of computational simulations.

## References

26. Moradi Kashkooli, F.; Abazari, M.A.; Soltani, M.; Akbarpour Ghazani, M.; Rahmim, A. A Spatiotemporal Multi-Scale Computational Model for FDG PET Imaging at Different Stages of Tumor Growth and Angiogenesis. *Sci. Rep.* **2022**. DOI: 10.1038/s41598-022-13345-4.
31. Soltani, M.; Chen, P. Numerical modeling of fluid flow in solid tumors. *PLoS ONE* **2011**, *6*, e20344. <https://doi.org/10.1371/journal.pone.0020344>.
